# Supplementary material for: Which Suture to Choose in Hepato-Pancreatic-Biliary Surgery? Assessment of the Influence of Pancreatic Juice and Bile on the Resistance of Suturing Materials—In Vitro Research
Source: MDPI journal article supplement (doi:10.3390/biomedicines10051053), 2022-05-02
Supplement: s1 [file s1]

*Supplementary Material*

# Which Suture to Choose in Hepato-Pancreatic-Biliary Surgery? Assessment of the Influence of Pancreatic Juice and Bile on the Resistance of Suturing Materials—In Vitro Research

Marcin Gierek <sup>1,\*</sup>, Katarzyna Merkel <sup>2,\*</sup>, Gabriela Ochała-Gierek <sup>3</sup>, Paweł Niemiec <sup>4</sup>, Karol Szyluk <sup>5,6</sup> and Katarzyna Kuśnierz <sup>7</sup>

<sup>1</sup> Center for Burns Treatment im. Dr Sakiel, ul. Jana Pawła II 2, 41-100 Siemianowice Śląskie, Poland; marcin.gierek@clo.com.pl

<sup>2</sup> Institute of Materials Engineering, Faculty of Science and Technology, University of Silesia, ul. 75. Pułku Piechoty, 41-500 Chorzów, Poland; Katarzyna.merkel@us.edu.pl

<sup>3</sup> Dermatology Department, City Hospital in Sosnowiec, ul. Zegadłowicza 3, 41-200 Sosnowiec, Poland; g.ochala@wp.pl

<sup>4</sup> Department of Biochemistry and Medical Genetics, Faculty of Health Sciences in Katowice, Medical University of Silesia in Katowice, 40-752 Katowice, Poland; pnemiec@sum.edu.pl

<sup>5</sup> Department of Physiotherapy, Faculty of Health Sciences in Katowice, Medical University of Silesia in Katowice, 40-752 Katowice, Poland; karol.szyluk@sum.edu.pl

<sup>6</sup> Department of Orthopaedic and Trauma Surgery, District Hospital of Orthopaedics and Trauma Surgery, 41-940 Piekary Śląskie, Poland

<sup>7</sup> Department of Gastrointestinal Surgery, Medical University of Silesia in Katowice, ul. Medyków 14, 40-752 Katowice, Poland; kasiachir@wp.pl

\* Correspondence: marcin.gierek@clo.com.pl (M.G.); Katarzyna.merkel@us.edu.pl (K.M.); Tel.: +486-6070-7704 (M.G.); +486-9834-2856 (K.M.).

**Citation:** Gierek, M.; Merkel, K.; Ochała-Gierek, G.; Niemiec, P.; Szyluk, K.; Kuśnierz, K. Which Suture to Choose in Hepato-Pancreatic-Biliary Surgery? Assessment of the Influence of Pancreatic Juice and Bile on the Resistance of Suturing Materials—In Vitro Research. *Biomedicines* **2022**, *10*, 1053. <https://doi.org/10.3390/biomedicines10051053>

Academic Editor: Mike Barbeck

Received: 27 March 2022

Accepted: 30 April 2022

Published: 2 May 2022

**Publisher's Note:** MDPI stays neutral with regard to jurisdictional claims in published maps and institutional affiliations.

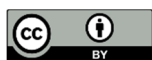

**Copyright:** © 2022 by the authors. Licensee MDPI, Basel, Switzerland. This article is an open access article distributed under the terms and conditions of the Creative Commons Attribution (CC BY) license (<https://creativecommons.org/licenses/by/4.0/>).

# 1. BASE STATE ASSESSMENT (BRAND NEW SURGICAL SUTURES)

**Table S1.** Amylase and lipase levels in pancreatic juice before freezing and after thawing along with pH measurements of pancreatic juice and bile.

| Nr | Amylase<br>(before freezing)<br>U/l | Amylase<br>(after thawing)<br>U/l | Lipase<br>(before freezing)<br>U/l | Lipase<br>(after thawing)<br>U/l | pH<br>pancreatic<br>juice | pH<br>bile |
|----|-------------------------------------|-----------------------------------|------------------------------------|----------------------------------|---------------------------|------------|
| 1  | 157 400                             | 138 920<br>122 700                | 789 200                            | 722 050<br>693 050               | +/- 7,7                   | +/- 6,8    |
| 2  | 66 440                              | 40 900                            | 392 400                            | 196 200                          |                           |            |
| 3  | 84 100                              | 78 560                            | 702 600                            | 577 000                          |                           |            |
| 4  | 21 260                              | 20 260                            | 84 590                             | 84 060                           |                           |            |

There was a slight decrease in amylase and lipase levels after thawing (mean decrease for amylase = 16.48% and for lipase = 17.64%).

**Table S2.** Assessment of the tensile strength of the reference surgical sutures used in the test (brand new threads).

| REFERENCE STATE                             |                       |        |       |       |                   |                   |                       |                   |          |          |                           |
|---------------------------------------------|-----------------------|--------|-------|-------|-------------------|-------------------|-----------------------|-------------------|----------|----------|---------------------------|
| Tensile<br>Strength<br>R <sub>m</sub> (MPa) | arithmetic<br>average | Median | Min.  | Max.  | Lower<br>Quartile | Upper<br>Quartile | Standard<br>deviation | Standard<br>Error | Skewness | Kurtosis | Test<br>Shapiro-<br>Wilka |
| MONOCRYL                                    | 236.5                 | 238.1  | 211.6 | 273.9 | 217.4             | 239.8             | 21.92                 | 8.95              | 0.8556   | 1.2525   | p = 0,3933                |
| MONOCRYL<br>Plus                            | 268.7                 | 268.9  | 222.3 | 305.0 | 251.0             | 296.0             | 31.14                 | 12.71             | -0.3661  | -0.9902  | p = 0,7751                |
| PDS                                         | 117.2                 | 112.7  | 109.6 | 132.5 | 110.5             | 125.0             | 9.38                  | 3.83              | 1.1627   | -0.3114  | p = 0,0727                |
| PDS Plus                                    | 127.8                 | 127.4  | 116.4 | 138.7 | 122.6             | 134.4             | 8.26                  | 3.37              | -0.0489  | -1.0993  | p = 0,9342                |
| VICRYL                                      | 293.0                 | 305.8  | 238.9 | 320.2 | 281.0             | 306.3             | 29.37                 | 11.99             | -1.5789  | 2.4181   | p = 0,0864                |
| VICRYL Plus                                 | 282.8                 | 278.1  | 262.6 | 315.0 | 263.8             | 299.3             | 22.11                 | 9.03              | 0.4988   | -1.7340  | p = 0,1953                |

- Levene's test showed homogeneity of variance: p = 0.0511
- ANOVA test showed a statistically significant difference in the R<sub>m</sub> level between the study groups (p < 0.0001)

**Table S3.** ANOVA statistical test results for the reference tensile strength (brand new threads): SS - sum of squares, MS - sum of mean squares, F - F index (F distribution)

| ANOVA TEST | SS      | Degrees of<br>freedom | MS      | F        | p        |
|------------|---------|-----------------------|---------|----------|----------|
| Intercept  | 1758079 | 1                     | 1758079 | 3565.931 | < 0.0001 |
| Material   | 185850  | 5                     | 37170   | 75.392   | < 0.0001 |
| Error      | 14791   | 30                    | 493     |          |          |

Table S4. Results of Tukey's post-hoc tensile strength test for reference suture state.

| Material      | MONOCRYL | MONOCRYL Plus | PDS    | PDS Plus | VICRYL | VICRYL Plus |
|---------------|----------|---------------|--------|----------|--------|-------------|
| MONOCRYL      | p =      | 0.1523        | 0.0001 | 0.0001   | 0.0017 | 0.0127      |
| MONOCRYL Plus | 0.1523   | p =           | 0.0001 | 0.0001   | 0.4248 | 0.8768      |
| PDS           | 0.0001   | 0.0001        | p =    | 0.9590   | 0.0001 | 0.0001      |
| PDS Plus      | 0.0001   | 0.0001        | 0.9590 | p =      | 0.0001 | 0.0001      |
| VICRYL        | 0.0017   | 0.4248        | 0.0001 | 0.0001   | p =    | 0.9666      |
| VICRYL Plus   | 0.0127   | 0.8768        | 0.0001 | 0.0001   | 0.9666 | p =         |

- Tukey's post-hoc test showed a statistically significant difference in the R<sub>m</sub> level between:

MONOCRYL vs. PDS;  
 MONOCRYL vs. PDS Plus;  
 MONOCRYL vs. VICRYL;  
 MONOCRYL vs. VICRYL Plus;  
 MONOCRYL Plus vs. PDS;  
 MONOCRYL Plus vs. PDS Plus;  
 PDS vs. VICRYL;  
 PDS vs. VICRYL Plus;  
 PDS Plus vs. VICRYL;  
 PDS Plus vs. VICRYL Plus.

## 2. EVALUATION OF THE INFLUENCE OF THE EXPOSURE TIME ON THE TENSILE STRENGTH (R<sub>m</sub>) - STERILE ENVIRONMENT

Table S5. Results of tensile strength tests of Monocryl sutures in saline (sterile environment).

| MONOCRYL SALINE - STERILE ENVIRONMENT |                    |        |       |       |                |                |                    |                |          |          |                    |
|---------------------------------------|--------------------|--------|-------|-------|----------------|----------------|--------------------|----------------|----------|----------|--------------------|
| Tensile Strength R <sub>m</sub> (MPa) | arithmetic average | Median | Min.  | Max.  | Lower Quartile | Upper Quartile | Standard deviation | Standard Error | Skewness | Kurtosis | Test Shapiro-Wilks |
| Reference                             | 236.5              | 238.1  | 211.6 | 273.9 | 217.4          | 239.8          | 21.92              | 8.95           | 0.8556   | 1.2525   | p = 0,3933         |
| 7 days                                | 132.7              | 136.2  | 113.5 | 149.4 | 116.8          | 143.9          | 14.58              | 5.95           | -0.4545  | -1.6955  | p = 0,4524         |
| 14 days                               | 93.0               | 94.0   | 78.0  | 112.5 | 81.3           | 98.1           | 12.59              | 5.14           | 0.4015   | -0.1993  | p = 0,7746         |
| 21 days                               | 35.3               | 35.7   | 30.4  | 41.2  | 32.0           | 36.6           | 3.79               | 1.55           | 0.3312   | 0.1625   | p = 0,8155         |
| 28 days                               | 6.9                | 7.1    | 5.7   | 7.7   | 6.5            | 7.4            | 0.69               | 0.28           | -0.9257  | 0.5636   | p = 0,6697         |

- The ANOVA test showed a statistically significant difference in the R<sub>m</sub> level between all exposure times (**p < 0.0001**) (i.e. statistically significant dynamics of R<sub>m</sub> changes)
- Tukey's post-hoc test showed a statistically significant difference in the R<sub>m</sub> level.  
There is a statistically significant decrease in the R<sub>m</sub> level with the lapse of the exposure time

Table S6. Results of tensile strength tests of Monocryl sutures in the pancreatic juice (sterile environment).

| MONOCRYL PANCREATIC JUICE - STERILE ENVIRONMENT |                    |        |      |      |                |                |                    |                |          |          |                    |
|-------------------------------------------------|--------------------|--------|------|------|----------------|----------------|--------------------|----------------|----------|----------|--------------------|
| Tensile Strength R <sub>m</sub> (MPa)           | arithmetic average | Median | Min. | Max. | Lower Quartile | Upper Quartile | Standard deviation | Standard Error | Skewness | Kurtosis | Test Shapiro-Wilks |

|           |       |       |       |       |       |       |       |      |         |         |            |
|-----------|-------|-------|-------|-------|-------|-------|-------|------|---------|---------|------------|
| Reference | 236.5 | 238.1 | 211.6 | 273.9 | 217.4 | 239.8 | 21.92 | 8.95 | 0.8556  | 1.2525  | p = 0,3933 |
| 7 days    | 116.8 | 118.1 | 93.1  | 135.4 | 109.7 | 126.3 | 15.41 | 6.29 | -0.4791 | -0.5871 | p = 0,6133 |
| 14 days   | 55.8  | 57.0  | 49.2  | 60.2  | 51.4  | 59.9  | 4.69  | 1.91 | -0.5229 | -1.8839 | p = 0,2516 |
| 21 days   | 9.3   | 9.2   | 7.0   | 11.1  | 8.4   | 10.9  | 1.58  | 0.64 | -0.2313 | -0.7770 | p = 0,7725 |

- The ANOVA test showed a statistically significant difference in the Rm level between all exposure times ( $p < 0.0001$ ) (i.e. statistically significant dynamics of Rm changes)
- Tukey's post-hoc test showed a statistically significant difference in the Rm level. There is a statistically significant decrease in the Rm level with the lapse of the exposure time

**Table S7. Results of tensile strength tests of Monocryl sutures in the bile (sterile environment).**

| MONOCRYL BILE - STERILE ENVIRONMENT |                    |        |       |       |                |                |                    |                |          |          |                    |
|-------------------------------------|--------------------|--------|-------|-------|----------------|----------------|--------------------|----------------|----------|----------|--------------------|
| Tensile Strength Rm (MPa)           | arithmetic average | Median | Min.  | Max.  | Lower Quartile | Upper Quartile | Standard deviation | Standard Error | Skewness | Kurtosis | Test Shapiro-Wilka |
| Reference                           | 236.5              | 238.1  | 211.6 | 273.9 | 217.4          | 239.8          | 21.92              | 8.95           | 0.8556   | 1.2525   | p = 0,3933         |
| 7 days                              | 123.6              | 123.2  | 110.7 | 136.3 | 113.5          | 134.9          | 10.81              | 4.41           | 0.0476   | -2.0876  | p = 0,4757         |
| 14 days                             | 70.8               | 70.1   | 64.5  | 77.9  | 64.6           | 77.7           | 6.50               | 2.65           | 0.1331   | -2.8810  | p = 0,0634         |
| 21 days                             | 16.6               | 16.2   | 13.1  | 20.9  | 14.9           | 19.1           | 2.64               | 1.00           | 0.4992   | -0.2815  | p = 0,8814         |

**Table S8. Results of tensile strength tests of Vicryl sutures in saline (sterile environment).**

| VICRYL SALINE - STERILE ENVIRONMENT |                    |        |       |       |                |                |                    |                |          |          |                    |
|-------------------------------------|--------------------|--------|-------|-------|----------------|----------------|--------------------|----------------|----------|----------|--------------------|
| Tensile Strength Rm (MPa)           | arithmetic average | Median | Min.  | Max.  | Lower Quartile | Upper Quartile | Standard deviation | Standard Error | Skewness | Kurtosis | Test Shapiro-Wilka |
| Reference                           | 293.0              | 305.8  | 238.9 | 320.2 | 281.0          | 306.3          | 29.37              | 11.99          | -1.5789  | 2.4181   | p = 0,0864         |
| 7 days                              | 252.6              | 241.5  | 208.3 | 309.1 | 210.7          | 304.2          | 44.63              | 18.22          | 0.5106   | -1.9478  | p = 0,1885         |
| 14 days                             | 208.0              | 205.3  | 171.3 | 241.3 | 190.0          | 234.6          | 28.03              | 11.44          | -0.0329  | -1.9912  | p = 0,5030         |
| 21 days                             | 190.9              | 189.8  | 155.3 | 227.3 | 157.9          | 225.2          | 31.32              | 12.79          | 0.0764   | -1.9307  | p = 0,3138         |
| 28 days                             | 63.0               | 61.5   | 51.2  | 77.5  | 54.0           | 72.0           | 10.96              | 4.47           | 0.2573   | -2.2627  | p = 0,3284         |

- The ANOVA test showed a statistically significant difference in the Rm level between all exposure times ( $p < 0.0001$ ) (i.e. statistically significant dynamics of Rm changes)
- Tukey's post-hoc test showed a statistically significant difference in the Rm level:
  - reference vs day 14 (decrease)
  - reference vs day 21 (decrease)
  - reference vs day 28 (decrease)
  - between day 7 and 21 (decrease)
  - between day 7 vs 28 (decrease)
  - between day 14 and day 28 (decrease)
  - between day 21 and day 28 (decrease)

Table S9. Results of tensile strength tests of Vicryl sutures in the pancreatic juice (sterile environment).

| VICRYL PANCREATIC JUICE - STERILE ENVIRONMENT |                    |        |       |       |                |                |                    |                |          |          |                    |
|-----------------------------------------------|--------------------|--------|-------|-------|----------------|----------------|--------------------|----------------|----------|----------|--------------------|
| Tensile Strength<br>R <sub>m</sub> (MPa)      | arithmetic average | Median | Min.  | Max.  | Lower Quartile | Upper Quartile | Standard deviation | Standard Error | Skewness | Kurtosis | Test Shapiro-Wilks |
| Reference                                     | 293.0              | 305.8  | 238.9 | 320.2 | 281.0          | 306.3          | 29.37              | 11.99          | -1.5789  | 2.4181   | p = 0,0864         |
| 7 days                                        | 240.4              | 239.2  | 194.2 | 284.0 | 215.7          | 270.2          | 36.18              | 14.77          | -0.0527  | -2.2352  | p = 0,4051         |
| 14 days                                       | 172.4              | 177.6  | 141.7 | 194.0 | 153.9          | 190.0          | 21.60              | 8.82           | -0.4913  | -1.7993  | p = 0,4291         |
| 21 days                                       | 93.7               | 89.1   | 77.9  | 123.7 | 82.6           | 99.8           | 16.43              | 6.71           | 1.4597   | 2.2465   | p = 0,2248         |

- The ANOVA test showed a statistically significant difference in the R<sub>m</sub> level between all exposure times ( $p < 0.0001$ ) (i.e. statistically significant dynamics of R<sub>m</sub> changes)
- Tukey's post-hoc test showed a statistically significant difference in the R<sub>m</sub> level. There is a statistically significant decrease in the R<sub>m</sub> level with the lapse of the exposure time

Table S10. Results of tensile strength tests of Vicryl sutures in the bile (sterile environment).

| VICRYL BILE - STERILE ENVIRONMENT        |                    |        |       |       |                |                |                    |                |          |          |                    |
|------------------------------------------|--------------------|--------|-------|-------|----------------|----------------|--------------------|----------------|----------|----------|--------------------|
| Tensile Strength<br>R <sub>m</sub> (MPa) | arithmetic average | Median | Min.  | Max.  | Lower Quartile | Upper Quartile | Standard deviation | Standard Error | Skewness | Kurtosis | Test Shapiro-Wilks |
| Reference                                | 293.0              | 305.8  | 238.9 | 320.2 | 281.0          | 306.3          | 29.37              | 11.99          | -1.5789  | 2.4181   | p = 0,0864         |
| 7 days                                   | 290.7              | 310.2  | 186.9 | 353.0 | 233.4          | 350.7          | 66.96              | 27.33          | -0.8282  | -0.8336  | p = 0,3065         |
| 14 days                                  | 206.7              | 210.3  | 177.0 | 240.2 | 177.7          | 224.9          | 26.73              | 10.91          | -0.0477  | -2.1963  | p = 0,3016         |
| 21 days                                  | 123.3              | 125.0  | 105.1 | 138.5 | 118.2          | 128.2          | 11.12              | 4.54           | -0.5664  | 1.3050   | p = 0,7695         |
| 28 days                                  | 19.9               | 19.7   | 16.3  | 23.7  | 18.9           | 21.2           | 2.49               | 1.02           | 0.1838   | 0.7397   | p = 0,9617         |

- The ANOVA test showed a statistically significant difference in the R<sub>m</sub> level between all exposure times ( $p < 0.0001$ ) (i.e. statistically significant dynamics of R<sub>m</sub> changes)
- Tukey's post-hoc test showed a statistically significant difference in the R<sub>m</sub> level:
  - reference vs day 14 (decrease)
  - reference vs day 21 (decrease)
  - reference vs day 28 (decrease)
  - between day 7 and 14 (decrease)
  - between day 7 and 21 (decrease)
  - between day 7 vs 28 (decrease)
  - between day 14 and day 21 (decrease)
  - between day 14 and day 28 (decrease)
  - between day 21 and day 28 (decrease)

Table S11. Results of tensile strength tests of PDS sutures in saline (sterile environment).

| PDS                                      |                    | SALINE - STERILE ENVIRONMENT |       |       |                |                |                    |                |          |          |                    |
|------------------------------------------|--------------------|------------------------------|-------|-------|----------------|----------------|--------------------|----------------|----------|----------|--------------------|
| Tensile Strength<br>R <sub>m</sub> (MPa) | arithmetic average | Median                       | Min.  | Max.  | Lower Quartile | Upper Quartile | Standard deviation | Standard Error | Skewness | Kurtosis | Test Shapiro-Wilka |
| Reference                                | 117.2              | 112.7                        | 109.6 | 132.5 | 110.5          | 125.0          | 9.38               | 3.83           | 1.1627   | -0.3114  | p = 0,0727         |
| 7 days                                   | 108.1              | 106.4                        | 97.9  | 120.1 | 103.0          | 114.8          | 8.07               | 3.30           | 0.4719   | -0.5460  | p = 0,8243         |
| 14 days                                  | 113.2              | 113.9                        | 103.5 | 122.9 | 105.0          | 120.1          | 7.86               | 3.21           | -0.1343  | -1.7220  | p = 0,6043         |
| 21 days                                  | 99.2               | 96.0                         | 87.5  | 115.9 | 95.6           | 104.3          | 9.75               | 3.98           | 0.9912   | 1.2698   | p = 0,3986         |
| 28 days                                  | 98.3               | 96.1                         | 91.0  | 112.1 | 94.3           | 99.9           | 7.36               | 3.00           | 1.6439   | 3.1938   | p = 0,1434         |

- The ANOVA test showed a statistically significant difference in the R<sub>m</sub> level between all exposure times (**p = 0.0019**) (i.e. statistically significant dynamics of R<sub>m</sub> changes)
- Tukey's post-hoc test showed a statistically significant difference in the R<sub>m</sub> level:
  - between day 14 vs 21 days (decrease)
  - between day 14 and 28 (decrease)
  - reference vs day 21 (decrease)
  - reference vs day 28 (decrease)

Table S12. Results of tensile strength tests of PDS sutures in the pancreatic juice (sterile environment).

| PDS                                      |                    | PANCREATIC JUICE - STERILE ENVIRONMENT |       |       |                |                |                    |                |          |          |                    |
|------------------------------------------|--------------------|----------------------------------------|-------|-------|----------------|----------------|--------------------|----------------|----------|----------|--------------------|
| Tensile Strength<br>R <sub>m</sub> (MPa) | arithmetic average | Median                                 | Min.  | Max.  | Lower Quartile | Upper Quartile | Standard deviation | Standard Error | Skewness | Kurtosis | Test Shapiro-Wilka |
| Reference                                | 117.2              | 112.7                                  | 109.6 | 132.5 | 110.5          | 125.0          | 9.38               | 3.83           | 1.1627   | -0.3114  | p = 0,0727         |
| 7 days                                   | 100.7              | 100.9                                  | 82.7  | 113.5 | 97.0           | 109.4          | 10.92              | 4.46           | -0.7265  | 0.5522   | p = 0,7639         |
| 14 days                                  | 88.4               | 87.8                                   | 72.8  | 111.3 | 76.0           | 94.5           | 13.88              | 5.67           | 0.7441   | 0.5895   | p = 0,6358         |
| 21 days                                  | 87.4               | 88.3                                   | 77.0  | 102.7 | 77.1           | 91.2           | 9.66               | 3.94           | 0.4660   | 0.0535   | p = 0,4539         |
| 28 days                                  | 49.3               | 51.5                                   | 38.0  | 53.4  | 48.9           | 52.4           | 5.75               | 2.35           | -2.06436 | 1.4503   | p = 0,0632         |

- The ANOVA test showed a statistically significant difference in the R<sub>m</sub> level between all exposure times (**p < 0.0001**) (i.e. statistically significant dynamics of R<sub>m</sub> changes)
- Tukey's post-hoc test showed a statistically significant difference in the R<sub>m</sub> level:
  - reference vs day 14 (decrease)
  - reference vs day 21 (decrease)
  - reference vs day 28 (decrease)
  - between day 7 and 28 (decrease)
  - between day 14 and day 28 (decrease)
  - between day 21 and day 28 (decrease)

Table S13. Results of tensile strength tests of PDS sutures in the bile (sterile environment).

| PDS                                      |                    | BILE - STERILE ENVIRONMENT |       |       |                |                |                    |                |          |          |                    |
|------------------------------------------|--------------------|----------------------------|-------|-------|----------------|----------------|--------------------|----------------|----------|----------|--------------------|
| Tensile Strength<br>R <sub>m</sub> (MPa) | arithmetic average | Median                     | Min.  | Max.  | Lower Quartile | Upper Quartile | Standard deviation | Standard Error | Skewness | Kurtosis | Test Shapiro-Wilks |
| Reference                                | 117.2              | 112.7                      | 109.6 | 132.5 | 110.5          | 125.0          | 9.38               | 3.83           | 1.1627   | -0.3114  | p = 0,0727         |
| 7 days                                   | 117.7              | 113.3                      | 108.1 | 139.2 | 109.0          | 123.5          | 11.92              | 4.87           | 1.4576   | 1.6984   | p = 0,1309         |
| 14 days                                  | 116.4              | 115.6                      | 112.3 | 123.5 | 114.9          | 116.4          | 3.77               | 1.54           | 1.5813   | 3.5622   | p = 0,1225         |
| 21 days                                  | 115.7              | 116.7                      | 106.9 | 121.1 | 111.6          | 121.0          | 5.56               | 2.27           | -0.7624  | -0.4164  | p = 0,4624         |
| 28 days                                  | 103.6              | 104.0                      | 96.8  | 109.4 | 98.3           | 108.7          | 5.20               | 2.12           | -0.2311  | -1.7292  | p = 0,4623         |

- The ANOVA test showed a statistically significant difference in the R<sub>m</sub> level between all exposure times (**p < 0.0001**) (i.e. statistically significant dynamics of R<sub>m</sub> changes)
- Tukey's post-hoc test showed a statistically significant difference in the R<sub>m</sub> level:
  - reference vs day 28 (decrease)
  - between day 7 and 28 (decrease)

### 3. EVALUATION OF THE INFLUENCE OF THE EXPOSURE TIME ON THE TENSILE STRENGTH (R<sub>m</sub>) - CONTAMINATED ENVIRONMENT

Table S14. Results of tensile strength tests of Monocryl sutures in the pancreatic juice (infected environment).

| MONOCRYL                                 |                    | PANCREATIC JUICE - CONTAMINATED ENVIRONMENT |       |       |                |                |                    |                |          |          |                    |
|------------------------------------------|--------------------|---------------------------------------------|-------|-------|----------------|----------------|--------------------|----------------|----------|----------|--------------------|
| Tensile Strength<br>R <sub>m</sub> (MPa) | arithmetic average | Median                                      | Min.  | Max.  | Lower Quartile | Upper Quartile | Standard deviation | Standard Error | Skewness | Kurtosis | Test Shapiro-Wilks |
| Reference                                | 236.5              | 238.1                                       | 211.6 | 273.9 | 217.4          | 239.8          | 21.92              | 8.95           | 0.8556   | 1.2525   | p = 0,3933         |
| 7 days                                   | 116.3              | 119.0                                       | 91.6  | 132.7 | 112.1          | 123.5          | 14.04              | 5.73           | -1.0940  | 1.7923   | p = 0,5525         |
| 14 days                                  | 26.4               | 26.3                                        | 21.2  | 32.6  | 22.3           | 29.5           | 4.33               | 1.77           | 0.2563   | -1.0115  | p = 0,8788         |
| 21 days                                  | 5.0                | 5.1                                         | 3.8   | 6.1   | 4.6            | 5.5            | 0.79               | 0.32           | -0.4306  | 0.5014   | p = 0,9516         |
| 28 days                                  | 236.5              | 238.1                                       | 211.6 | 273.9 | 217.4          | 239.8          | 21.92              | 8.95           | 0.8556   | 1.2525   | p = 0,3933         |

- The ANOVA test showed a statistically significant difference in the R<sub>m</sub> level between all exposure times (**p < 0.0001**) (i.e. statistically significant dynamics of R<sub>m</sub> changes)
- There is a statistically significant decrease in the R<sub>m</sub> level with the lapse of the exposure time.

Table S15. Results of tensile strength tests of Monocryl sutures in the bile (infected environment).

| MONOCRYL BILE - CONTAMINATED ENVIRONMENT |                    |        |       |       |                |                |                    |                |          |          |                    |
|------------------------------------------|--------------------|--------|-------|-------|----------------|----------------|--------------------|----------------|----------|----------|--------------------|
| Tensile Strength<br>R <sub>m</sub> (MPa) | arithmetic average | Median | Min.  | Max.  | Lower Quartile | Upper Quartile | Standard deviation | Standard Error | Skewness | Kurtosis | Test Shapiro-Wilka |
| Reference                                | 236.5              | 238.1  | 211.6 | 273.9 | 217.4          | 239.8          | 21.92              | 8.95           | 0.8556   | 1.2525   | p = 0,3933         |
| 7 days                                   | 109.7              | 114.1  | 88.5  | 120.1 | 105.0          | 116.3          | 11.55              | 4.71           | -1.5425  | 2.2581   | p = 0,1525         |
| 14 days                                  | 66.1               | 67.4   | 54.6  | 76.2  | 60.5           | 70.7           | 7.69               | 3.14           | -0.3814  | -0.3109  | p = 0,9633         |
| 21 days                                  | 13.1               | 13.5   | 10.8  | 15.2  | 12.0           | 13.8           | 1.52               | 0.62           | -0.3588  | -0.0376  | p = 0,8607         |
| 28 days                                  | 236.5              | 238.1  | 211.6 | 273.9 | 217.4          | 239.8          | 21.92              | 8.95           | 0.8556   | 1.2525   | p = 0,3933         |

- The ANOVA test showed a statistically significant difference in the R<sub>m</sub> level between all exposure times ( $p < 0.0001$ ) (i.e. statistically significant dynamics of R<sub>m</sub> changes)
- There is a statistically significant decrease in the R<sub>m</sub> level with the lapse of the exposure time.

Table S16. Results of tensile strength tests of Vicryl sutures in the pancreatic juice (infected environment).

| VICRYL PANCREATIC JUICE - CONTAMINATED ENVIRONMENT |                    |        |       |       |                |                |                    |                |          |          |                    |
|----------------------------------------------------|--------------------|--------|-------|-------|----------------|----------------|--------------------|----------------|----------|----------|--------------------|
| Tensile Strength<br>R <sub>m</sub> (MPa)           | arithmetic average | Median | Min.  | Max.  | Lower Quartile | Upper Quartile | Standard deviation | Standard Error | Skewness | Kurtosis | Test Shapiro-Wilka |
| Reference                                          | 293.0              | 305.8  | 238.9 | 320.2 | 281.0          | 306.3          | 29.37              | 11.99          | -1.5789  | 2.4181   | p = 0,0864         |
| 7 days                                             | 161.8              | 158.3  | 148.6 | 184.2 | 150.6          | 170.6          | 13.41              | 5.47           | 1.0141   | 0.2962   | p = 0,3711         |
| 14 days                                            | 53.0               | 56.5   | 42.8  | 59.1  | 44.2           | 58.9           | 7.60               | 3.10           | -0.7822  | -1.9102  | p = 0,0511         |
| 21 days                                            | 15.4               | 14.8   | 12.6  | 18.8  | 13.3           | 18.1           | 2.54               | 1.04           | 0.4784   | -1.6721  | p = 0,4541         |
| 28 days                                            | 293.0              | 305.8  | 238.9 | 320.2 | 281.0          | 306.3          | 29.37              | 11.99          | -1.5789  | 2.4181   | p = 0,0864         |

- The ANOVA test showed a statistically significant difference in the R<sub>m</sub> level between all exposure times ( $p < 0.0001$ ) (i.e. statistically significant dynamics of R<sub>m</sub> changes)
- There is a statistically significant decrease in the R<sub>m</sub> level with the lapse of the exposure time.

Table S17. Results of tensile strength tests of Vicryl sutures in the bile (infected environment).

| VICRYL BILE - CONTAMINATED ENVIRONMENT   |                    |        |       |       |                |                |                    |                |          |          |                    |
|------------------------------------------|--------------------|--------|-------|-------|----------------|----------------|--------------------|----------------|----------|----------|--------------------|
| Tensile Strength<br>R <sub>m</sub> (MPa) | arithmetic average | Median | Min.  | Max.  | Lower Quartile | Upper Quartile | Standard deviation | Standard Error | Skewness | Kurtosis | Test Shapiro-Wilka |
| Reference                                | 293.0              | 305.8  | 238.9 | 320.2 | 281.0          | 306.3          | 29.37              | 11.99          | -1.5789  | 2.4181   | p = 0,0864         |
| 7 days                                   | 217.9              | 224.9  | 175.6 | 234.9 | 214.1          | 233.1          | 22.44              | 9.16           | -1.7119  | 3.0561   | p = 0,0506         |
| 14 days                                  | 159.0              | 160.9  | 110.1 | 200.9 | 128.5          | 192.9          | 35.31              | 14.42          | -0.2272  | -1.3036  | p = 0,6397         |
| 21 days                                  | 42.8               | 43.9   | 35.5  | 45.9  | 42.3           | 45.5           | 3.81               | 1.55           | -1.8598  | 3.7601   | p = 0,0528         |
| 28 days                                  | 293.0              | 305.8  | 238.9 | 320.2 | 281.0          | 306.3          | 29.37              | 11.99          | -1.5789  | 2.4181   | p = 0,0864         |

- The ANOVA test showed a statistically significant difference in the R<sub>m</sub> level between all exposure times ( $p < 0.0001$ ) (i.e. statistically significant dynamics of R<sub>m</sub> changes)



- There is a statistically significant decrease in the Rm level with the lapse of the exposure time.

Table S18. Results of tensile strength tests of PDS sutures in the pancreatic juice (infected environment).

| PDS PANCREATIC JUICE - CONTAMINATED ENVIRONMENT |                    |        |       |       |                |                |                    |                |          |          |                    |
|-------------------------------------------------|--------------------|--------|-------|-------|----------------|----------------|--------------------|----------------|----------|----------|--------------------|
| Tensile Strength R <sub>m</sub> (MPa)           | arithmetic average | Median | Min.  | Max.  | Lower Quartile | Upper Quartile | Standard deviation | Standard Error | Skewness | Kurtosis | Test Shapiro-Wilks |
| Reference                                       | 117.2              | 112.7  | 109.6 | 132.5 | 110.5          | 125.0          | 9.38               | 3.83           | 1.1627   | -0.3114  | p = 0,0727         |
| 7 days                                          | 115.3              | 114.5  | 107.5 | 124.4 | 112.7          | 118.3          | 5.67               | 2.32           | 0.4601   | 0.9354   | p = 0,9269         |
| 14 days                                         | 116.0              | 113.4  | 102.6 | 136.2 | 111.6          | 118.7          | 11.21              | 4.58           | 1.2253   | 2.6110   | p = 0,3024         |
| 21 days                                         | 85.6               | 87.6   | 63.2  | 102.6 | 76.0           | 96.9           | 14.69              | 6.00           | -0.5299  | -0.7595  | p = 0,8142         |
| 28 days                                         | 63.6               | 66.5   | 47.6  | 72.2  | 57.3           | 71.8           | 9.94               | 4.06           | -0.8656  | -0.4635  | p = 0,2137         |

- The ANOVA test showed a statistically significant difference in the Rm level between all exposure times ( $p < 0.0001$ ) (i.e. statistically significant dynamics of Rm changes)
- Tukey's post-hoc test showed a statistically significant difference in the Rm level:
  - reference vs day 21 (decrease)
  - reference vs day 28 (decrease)
  - between day 7 and 21 (decrease)
  - between day 7 and 28 (decrease)
  - between day 14 and day 21 (decrease)
  - between day 14 and day 28 (decrease)
  - between day 21 and day 28 (decrease)

Table S19. Results of tensile strength tests of PDS sutures in the bile (infected environment).

| PDS BILE - CONTAMINATED ENVIRONMENT   |                    |        |       |       |                |                |                    |                |          |          |                    |
|---------------------------------------|--------------------|--------|-------|-------|----------------|----------------|--------------------|----------------|----------|----------|--------------------|
| Tensile Strength R <sub>m</sub> (MPa) | arithmetic average | Median | Min.  | Max.  | Lower Quartile | Upper Quartile | Standard deviation | Standard Error | Skewness | Kurtosis | Test Shapiro-Wilks |
| Reference                             | 117.2              | 112.7  | 109.6 | 132.5 | 110.5          | 125.0          | 9.38               | 3.83           | 1.1627   | -0.3114  | p = 0,0727         |
| 7 days                                | 119.2              | 119.5  | 104.2 | 131.2 | 112.3          | 128.7          | 10.72              | 4.38           | -0.2672  | -1.7861  | p = 0,5072         |
| 14 days                               | 120.2              | 121.2  | 114.3 | 123.6 | 117.9          | 123.0          | 3.65               | 1.49           | -0.8639  | -0.3862  | p = 0,3349         |
| 21 days                               | 106.7              | 106.4  | 97.7  | 113.9 | 106.0          | 109.9          | 5.36               | 2.19           | -0.6538  | 1.7161   | p = 0,5139         |
| 28 days                               | 102.3              | 106.1  | 87.9  | 111.1 | 95.4           | 107.3          | 8.81               | 3.60           | -1.0745  | -0.0760  | p = 0,2089         |

- The ANOVA test showed a statistically significant difference in the Rm level between all exposure times ( $p = 0,0014$ ) (i.e. statistically significant dynamics of Rm changes)
- Tukey's post-hoc test showed a statistically significant difference in the Rm level:
  - reference vs day 21 (decrease)
  - reference vs day 28 (decrease)
  - between day 7 and 21 (decrease)
  - between day 7 and 28 (decrease)
  - between day 14 and day 21 (decrease)
  - between day 14 and day 28 (decrease)
